# Supplementary material
Source: publisher figshare collection journal article supplement (https://gsapubs.figshare.com/ndownloader/files/22742264)
Supplement: Supplementary file 1 [file 22742264]

**TABLE I (for GSA Data Repository)**

**Paper #G13599**, " Large Neogene Subsidence Event along the Middle America Trench off Mexico (18°-19°N): Evidence from Submersible Observations ", B.Mercier de Lépinay, F.Michaud and others

**FISSION TRACK ANALYTIC DATA**

| Sample   | Elevation<br>a.s.l. (m) | Latitude<br>N | Longitude<br>W | $\rho\sigma$<br>$\times 10^5 \text{ cm}^2$<br>(Ns), <sup>a</sup> | $\rho i$<br>$\times 10^5 \text{ cm}^2$<br>(Ni) <sup>b</sup> | Number<br>of grains | $P(\chi^2)^c$<br>% | $\rho\Delta$<br>$\times 10^5 \text{ cm}^2$<br>(N <sub>D</sub> ) <sup>d</sup> | Age<br>(Ma) | 1 $\sigma$ | Mean track<br>length mm $\pm$ 1 $\sigma$ | number<br>of tracks |
|----------|-------------------------|---------------|----------------|------------------------------------------------------------------|-------------------------------------------------------------|---------------------|--------------------|------------------------------------------------------------------------------|-------------|------------|------------------------------------------|---------------------|
| NM 11 06 | -3703                   | 18°24'27"     | 104°32'45"     | 17.5 (728)                                                       | 17.2 (717)                                                  | 9                   | >99                | 3.384 (13425)                                                                | 57          | 3          | 15.15 $\pm$ 1.01                         | 32                  |
| NM 11 11 | -3246                   | 18°24'47"     | 104°32'11"     | 2.78 (2764)                                                      | 1.57 (1598)                                                 | 12                  | 3                  | 2.175 (14379)                                                                | 64          | 8          | 15.55 $\pm$ 1.18                         | 102                 |
| NM 11 12 | -2892                   | 18°25'02"     | 104°31'55"     | 1.70 (984)                                                       | 1.72 (997)                                                  | 7                   | 95                 | 3.384 (13425)                                                                | 54          | 2.5        | 15.42 $\pm$ 0.97                         | 160                 |

Apatite fission track ages are calculated using a zeta of 339 for the samples NM-11-06 and NM-11-12, and a zeta of 324 for the sample NM-11-11, for NBS glass 612 and 962.

a: Spontaneous track density and number of spontaneous tracks counted.

b: induced track density and number of induced tracks counted.

c: probability of obtaining observed  $\chi^2$  value for N degrees of freedom (N=number of counted grains-1) (Galbraith, 1981). Accordingly age of NM-11-11 was calculated following Green (1981).

d: track density measured in external detector adjacent to glass dosimeter during irradiation, and number of tracks counted in determining  $\rho\Delta$ .

**REFERENCES**

Galbraith, R. F., 1981, On statistical models for fission track counts, Math. Geol., 13, p. 471-488.

Green, P. F., 1981, A new look at statistics in fission track dating, Nucl. Tracks, 5, p. 77-86.
